# Supplementary material for: Small-angle neutron scattering studies on the AMPA receptor GluA2 in the resting, AMPA-bound and GYKI-53655-bound states
Source: PubMed Central journal article supplement (PMC6211538; doi:10.1107/s2052252518012186), 2018-10-11
Supplement: m-05-00780-sup1.pdf [file m-05-00780-sup1.pdf]

# IUCrJ

**Volume 5 (2018)**

**Supporting information for article:**

**Small-angle neutron scattering studies on the AMPA receptor GluA2 in the resting, AMPA and GYKI-53655 bound states**

**Andreas Haahr Larsen, Jerzy Dorosz, Thor Seneca Thorsen, Nicolai Tidemand Johansen, Tamim Darwish, Søren Roi Midtgaard, Lise Arleth and Jette Sandholm Kastrup**

**Table S1** Information about the samples, the SANS measurements and the software used for the data analysis.

|                                                                                                                         | <b>GluA2,<br/>Apo,<br/>in dDDM.</b>                                                             | <b>GluA2,<br/>AMPA-bound<br/>state,<br/>in dDDM,<br/>neutral pH.</b> | <b>GluA2,<br/>AMPA-bound<br/>state,<br/>in dDDM,<br/>acidic pH.</b> | <b>GluA2,<br/>GYKI-53655<br/>bound state,<br/>in dDDM.</b> |
|-------------------------------------------------------------------------------------------------------------------------|-------------------------------------------------------------------------------------------------|----------------------------------------------------------------------|---------------------------------------------------------------------|------------------------------------------------------------|
| <b>Sample details</b>                                                                                                   |                                                                                                 |                                                                      |                                                                     |                                                            |
| Uniprot ID                                                                                                              | P19491 (GRIA2_RAT)                                                                              |                                                                      |                                                                     |                                                            |
| Organism                                                                                                                | <i>Rattus Norvegicus</i>                                                                        |                                                                      |                                                                     |                                                            |
| Ligands                                                                                                                 | None                                                                                            | 1 mM AMPA                                                            | 10 mM AMPA                                                          | 1 mM GYKI-53655                                            |
| Buffer                                                                                                                  | 20 mM Tris/DCl, 100 mM NaCl, 0.5 mM dDDM, pH 7.5                                                | 20 mM Tris/DCl, 100 mM NaCl, 0.5 mM dDDM, pH 7.5                     | 20 mM Tris/DCl, 100 mM NaCl, 0.5 mM dDDM, pH 5.5                    | 20 mM Tris/DCl, 100 mM NaCl, 0.5 mM dDDM, pH 7.5           |
| Extinction coefficient* <sup>1</sup> [M <sup>-1</sup> cm <sup>-1</sup> ]                                                | 519100                                                                                          |                                                                      |                                                                     |                                                            |
| Density* <sup>2</sup> [g/ml]                                                                                            | 1.37                                                                                            |                                                                      |                                                                     |                                                            |
| Molecular weight* <sup>1</sup> [kDa]                                                                                    | 367.7                                                                                           |                                                                      |                                                                     |                                                            |
| Mean scattering length density* <sup>2</sup> of protein in D <sub>2</sub> O [10 <sup>-6</sup> Å <sup>-2</sup> ]         | 3.0                                                                                             |                                                                      |                                                                     |                                                            |
| Mean scattering length density* <sup>2</sup> of DDM tail groups in D <sub>2</sub> O [10 <sup>-6</sup> Å <sup>-2</sup> ] | 6.4                                                                                             |                                                                      |                                                                     |                                                            |
| Mean scattering length density* <sup>2</sup> of DDM head groups in D <sub>2</sub> O [10 <sup>-6</sup> Å <sup>-2</sup> ] | 6.4                                                                                             |                                                                      |                                                                     |                                                            |
| Mean scattering length density* <sup>2</sup> of solvent (D <sub>2</sub> O) [10 <sup>-6</sup> Å <sup>-2</sup> ]          | 6.4                                                                                             |                                                                      |                                                                     |                                                            |
| Protein concentration* <sup>3</sup>                                                                                     | 0.20 mg/ml<br>0.54 μM                                                                           | 0.31 mg/ml<br>0.84 μM                                                | 0.17 mg/ml<br>0.46 μM                                               | 0.31 mg/ml<br>0.84 μM                                      |
| <b>SANS data collection details</b>                                                                                     |                                                                                                 |                                                                      |                                                                     |                                                            |
| Instrument                                                                                                              | KWS1@FRM2 ( <a href="https://www.mlz-garching.de/kws-1">https://www.mlz-garching.de/kws-1</a> ) |                                                                      |                                                                     |                                                            |
| Date for data collection                                                                                                | 19/09 2017                                                                                      | 8/12 2016                                                            | 19/09 2017                                                          | 8/12 2016                                                  |

|                                                                         |                                                                                                                                                                                                                                             |               |                |               |
|-------------------------------------------------------------------------|---------------------------------------------------------------------------------------------------------------------------------------------------------------------------------------------------------------------------------------------|---------------|----------------|---------------|
| Wavelength ( $\lambda_{\text{mean}}$ , $\Delta\lambda/\lambda$ )        | 5.0 Å, 10 % (FWHM)                                                                                                                                                                                                                          |               |                |               |
| Beam dimensions                                                         | Rectangular beam, 6x10 mm <sup>2</sup> (at sample), 30x30 mm <sup>2</sup> (first pinhole)                                                                                                                                                   |               |                |               |
| Resolution effects                                                      | Width of the resolution function $\Delta q(q)$ was calculated by the beamline software and given in the 4 <sup>th</sup> column in data, which was used in WillItFit.                                                                        |               |                |               |
| Settings<br>(Sample-detector/Collimation)                               | 1.5m/4.0m, 4.0m/4.0m, 8.0m/8.0m                                                                                                                                                                                                             |               |                |               |
| Measured $q$ -range                                                     | 0.006-0.3 Å <sup>-1</sup>                                                                                                                                                                                                                   |               |                |               |
| Absolute calibration                                                    | By plexiglass                                                                                                                                                                                                                               |               |                |               |
| Exposure time (total for all 3 settings)                                | ~ 2.5 hours                                                                                                                                                                                                                                 | ~ 4.5 hours   | ~ 4.5 hours    | ~ 4.0 hours   |
| Temperature                                                             | 10 °C                                                                                                                                                                                                                                       |               |                |               |
| <b>Software employed</b>                                                |                                                                                                                                                                                                                                             |               |                |               |
| Indirect Fourier transformations to obtain $p(r)$                       | BayesApp <sup>R1,R2</sup> ( <a href="http://www.bayesapp.org">www.bayesapp.org</a> )                                                                                                                                                        |               |                |               |
| Calculation of theoretical $p(r)$<br>Addition of water layer to protein | CaPP ( <a href="https://github.com/Niels-Bohr-Institute-XNS-StructBiophys/CaPP">https://github.com/Niels-Bohr-Institute-XNS-StructBiophys/CaPP</a> )                                                                                        |               |                |               |
| Fitting of data with combined analytical and atomistic models           | WillItFit <sup>R3</sup> ( <a href="https://sourceforge.net/projects/willitfit">https://sourceforge.net/projects/willitfit</a> )                                                                                                             |               |                |               |
| Fischer/Petoukhov $M_W$ determination                                   | Own implementation in MATLAB (Table S3)                                                                                                                                                                                                     |               |                |               |
| Missing sequence modelling                                              | MODELLER <sup>R4</sup> ( <a href="https://salilab.org?modeller">https://salilab.org?modeller</a> )                                                                                                                                          |               |                |               |
| Graphic model visualization                                             | PyMOL                                                                                                                                                                                                                                       |               |                |               |
| Guinier analysis                                                        | Own implementation in MATLAB (Fig. S6)                                                                                                                                                                                                      |               |                |               |
| <i>Ab initio</i> dummy bead modelling                                   | DAMMIF <sup>R5</sup> ( <a href="https://www.embl-hamburg.de/biosaxs/dammif.html">https://www.embl-hamburg.de/biosaxs/dammif.html</a> )<br>Note: DATGNOM <sup>R6,R7</sup> was used to generate the $p(r)$ function needed as input to DAMMIF |               |                |               |
| <b>Structural parameters</b>                                            |                                                                                                                                                                                                                                             |               |                |               |
| <i>Guinier analysis</i>                                                 |                                                                                                                                                                                                                                             |               |                |               |
| $I(0)$ [cm <sup>-1</sup> ]                                              | 0.043 ± 0.002                                                                                                                                                                                                                               | 0.108 ± 0.004 | 0.052 ± 0.07*4 | 0.109 ± 0.004 |
| Mw from $I(0)$ [kDa]                                                    | 220                                                                                                                                                                                                                                         | 347           | 240            | 347           |
| (ratio to expected)                                                     | (0.60)                                                                                                                                                                                                                                      | (0.94)        | (0.66)         | (0.94)        |
| $R_g$ [Å]                                                               | 60.8 ± 4.3                                                                                                                                                                                                                                  | 62.2 ± 3.0    | 79.1 ± 11.5*4  | 62.8 ± 3.3    |
| Minimum $q$ used [Å <sup>-1</sup> ]                                     | 0.0069                                                                                                                                                                                                                                      | 0.0078        | 0.0104         | 0.0103        |
| Maximum $q \cdot R_g$                                                   | 1.26                                                                                                                                                                                                                                        | 1.24          | 1.29           | 1.30          |
| <i>p(r) analysis</i>                                                    |                                                                                                                                                                                                                                             |               |                |               |

|                                                                                                                                                           |                    |                    |                    |                    |
|-----------------------------------------------------------------------------------------------------------------------------------------------------------|--------------------|--------------------|--------------------|--------------------|
| $I(0)$ [cm <sup>-1</sup> ]                                                                                                                                | 0.0444 ± 0.0002    | 0.106 ± 0.001      | 0.0418 ± 0.0004    | 0.109 ± 0.001      |
| $R_g$ [Å]                                                                                                                                                 | 61.9 ± 0.4         | 61.0 ± 0.6         | 65.2 ± 0.5         | 62.1 ± 0.3         |
| $D_{max}$ [Å]                                                                                                                                             | 179 ± 11           | 184 ± 11           | 189 ± 5            | 186 ± 5            |
| Used $q$ -range                                                                                                                                           | [0.011,0.20]       | [0.011,0.20]       | [0.019,0.21]       | [0.012,0.20]       |
| Fitted constant background [cm <sup>-1</sup> ]                                                                                                            | 0.00052            | 0.00089            | 0.00048            | 0.00090            |
| Reduced $\chi^2$                                                                                                                                          | 2.15               | 6.84               | 1.39               | 6.60               |
| Number of good parameters                                                                                                                                 | 5.2                | 4.2                | 4.1                | 5.5                |
| Number of Shannon channels                                                                                                                                | 11.8               | 11.0               | 11.7               | 11.0               |
| Number of error calculations                                                                                                                              | 260                | 759                | 95                 | 264                |
| Regularization parameter $\log(\alpha)$                                                                                                                   | 14.3               | 14.7               | 14.0               | 14.3               |
| <i>Fischer <math>M_w</math> determination</i> <sup>*5</sup>                                                                                               |                    |                    |                    |                    |
| Molecular weight [kDa]<br>(ratio to expected)                                                                                                             | 396 ± 52<br>(1.08) | 379 ± 49<br>(1.03) | 442 ± 57<br>(1.20) | 373 ± 48<br>(1.01) |
| <b>Model fitting parameters</b>                                                                                                                           |                    |                    |                    |                    |
| <i>Combined analytical and atomistic model</i>                                                                                                            |                    |                    |                    |                    |
| $q$ -range for fitting [Å <sup>-1</sup> ]                                                                                                                 | [0.006,0.3]        | [0.006,0.3]        | [0.006,0.3]        | [0.006,0.3]        |
| Reduced $\chi^2$ (best fit)                                                                                                                               | 3.3                | 5.0                | 1.9                | 7.5                |
| <i>Ab initio dummy bead modelling</i>                                                                                                                     |                    |                    |                    |                    |
| Number of calculations                                                                                                                                    | 10                 | --*6               | --*6               | --*6               |
| Symmetry                                                                                                                                                  | P1, none           |                    |                    |                    |
| NSD                                                                                                                                                       | 1.5 ± 0.1          |                    |                    |                    |
| Resolution (from SASRES <sup>R8</sup> ) [Å]                                                                                                               | 56 ± 4             |                    |                    |                    |
| Filtered volume [nm <sup>3</sup> ]                                                                                                                        | 380                |                    |                    |                    |
| Mw from filtered volume<br>(ratio to expected)                                                                                                            | 238 kDa<br>(0.92)  |                    |                    |                    |
| <b>SASBDB IDs for data and models</b>                                                                                                                     |                    |                    |                    |                    |
| SASBDB ID                                                                                                                                                 | SASDDY5            | SASDDZ5            | SASDD26            | SASDD36            |
| <b>Footnotes and references</b>                                                                                                                           |                    |                    |                    |                    |
| *1 Calculated with Expasy Protparam ( <a href="https://web.expasy.org/protparam/">https://web.expasy.org/protparam/</a> ).                                |                    |                    |                    |                    |
| *2 Calculated with Biomolecular Scattering Length Density Calculator ( <a href="http://psldc.isis.rl.ac.uk/Psldc">http://psldc.isis.rl.ac.uk/Psldc</a> ). |                    |                    |                    |                    |

\*<sup>3</sup> Protein concentration determined by UV280 absorption for GluA2 AMPA-bound at pH 7.5 and GluA2 GYKI-bound. Determined with BCA assay for GluA in the resting state and GluA2 AMPA-bound at pH 5.5.

\*<sup>4</sup> It was not possible to obtain fully linear region at  $qR_G < 1.3$  (Fig. S6C), so the the values may be incorrect.

\*<sup>5</sup>  $M_W$  determined with the Fischer method (Fischer *et al.*, 2011) with parameters given in Table S3.

\*<sup>6</sup> The dummy atom model for GluA2 apo is approximate, since aggregation was not taken into account. For the same reason, a dummy atom model was only generated for the GluA2 apo sample, where the aggregation scattering contribution was very minor.

R<sup>1</sup> Hansen, S. (2000). *J. Appl. Cryst.* **33**, 1415-1421.

R<sup>2</sup> Hansen, S. (2014). *J. Appl. Cryst.* **47**, 1469-1471.

R<sup>3</sup> Pedersen, M. C., Arleth, L. & Mortensen, K. (2013). *J. Appl. Cryst.* **46**, 1894-1898.

R<sup>4</sup> Fiser, A., Do, R.K. & Sali, A. (2000). *Protein Sci.* **9**, 1753-1773.

R<sup>5</sup> Franke, D. & Svergun, D. I. (2009). *J. Appl. Cryst.* **42**, 342-346.

R<sup>6</sup> Konarev, P. V., Volkov, V. V., Sokolova, A. V., Koch, M. H. J. & Svergun, D. I. (2003). *J. Appl. Cryst.* **36**, 1277-1282.

R<sup>7</sup> Petoukhov, M. V., Konarev, P. V., Kikhney, A. G. & Svergun, D. I. (2007). *J. Appl. Cryst.* **40**, 223-228.

R<sup>8</sup> Tuukkanen, A. T., Kleywegt, G. J. & Svergun, D. I. (2016). *IUCrJ* **3**, 440-447.

**Table S2** Fischer and Petoukhov  $M_W$  determination (Petoukhov *et al.*, 2012; Fisher *et al.*, 2010), where  $M_W$  is determined via. the scattering “invariant”  $Q$  (Porod, 1982)

The upper integration limit  $q_m$  used to determine  $Q$  was  $8/R_g$  (Petoukhov *et al.*, 2012).  $V_{app}$  is the apparent volume, and is the same for the two methods. In the Fischer method, linear coefficients  $A$  and  $B$  given in the table are used to convert  $V_{app}$  to the Porod volume  $V_p$ , and the weight-to-volume conversion constant of  $0.83 \text{ kDa/nm}^3$  to obtain  $M_W^F$ . In the Petoukhov method,  $M_W^P$  is determined directly from the  $V_{app}$  using the conversion constant  $0.625 \text{ kDa/nm}^3$ . The constant subtracted backgrounds  $K$  were used to assure a constant plateau in the Porod plots (Fig. S2) and the data sets were extrapolated to  $q = 0$  by simple linear extrapolation. An implementation in MATLAB of the methods was used. The value for  $M_W$  obtained with the Fisher method is given in Table S1 and used in the paper, since this method takes the size of the particle into account, which adds an important correction for large proteins such as GluA2. Values of  $R_g$  and  $I(0)$  from the  $p(r)$  analysis were used (Table S1).

| Fischer/Petoukhov $M_W$ determination                             | Resting                        | AMPA pH 7.5*1                  | AMPA pH 5.5                    | GYKI-53655                     |
|-------------------------------------------------------------------|--------------------------------|--------------------------------|--------------------------------|--------------------------------|
| $V_{app}$ [nm <sup>3</sup> ]                                      | 871.7                          | 833.4                          | 970.1                          | 820.4                          |
| $M_W^F$ *1 [kDa]<br>(ratio to expected)<br>$\Delta M_W/\sigma$ *2 | $396 \pm 52$<br>(1.08)<br>0.56 | $379 \pm 49$<br>(1.03)<br>0.22 | $442 \pm 57$<br>(1.20)<br>1.3  | $373 \pm 48$<br>(1.01)<br>0.1  |
| $M_W^P$ * [kDa]<br>(ratio to expected)<br>$\Delta M_W/\sigma$     | $545 \pm 109$<br>(1.48)<br>1.5 | $521 \pm 104$<br>(1.42)<br>1.5 | $606 \pm 121$<br>(2.65)<br>2.8 | $513 \pm 103$<br>(1.39)<br>1.4 |
| $K$ [10 <sup>-3</sup> cm <sup>-1</sup> ]                          | 0.65                           | 1.30                           | 0.61                           | 1.30                           |
| $q_m = 8/R_g$ [Å <sup>-1</sup> ]                                  | 0.133                          | 0.131                          | 0.127                          | 0.131                          |
| $A$ [Å <sup>3</sup> ]<br>$B$                                      | -10500<br>0.56                 | -10500<br>0.56                 | -10500<br>0.56                 | -10500<br>0.56                 |

\*1 Assuming a 13% uncertainty on  $M_W^F$  (Fischer *et al.*, 2010, p. 106), and a 20% uncertainty on  $M_W^P$  (Petoukhov *et al.*, 2012, p. 344).

\*2  $\Delta M_W/\sigma$  is the normalized residual molecular weight, i.e. the difference between the experimentally determined value and the expected molecular weight in units of the experimental error. If  $M_W/\sigma < 2$  then the null-hypothesis (tetrameric state) cannot be rejected, given a significance level of 5%.

**Table S3**  $R_g$  of fractal oligomers and the amount of oligomers in the fitted models.

| <b>Data</b>                                     | <b>Apo</b>                    | <b>AMPA pH 7.5</b>           |                           |                           | <b>AMPA pH 5.5</b>          | <b>GYKI-53655</b>         |
|-------------------------------------------------|-------------------------------|------------------------------|---------------------------|---------------------------|-----------------------------|---------------------------|
| Model                                           | X-ray, rest. +<br>frac. olig. | X-ray, rest +<br>frac. olig. | EM, act. +<br>frac. olig. | EM, des. +<br>frac. olig. | EM, class3 +<br>frac. olig. | EM, GYKI +<br>frac. olig. |
| $R_g$ for fractal<br>oligomers [ $\text{\AA}$ ] | $126 \pm 250$                 | $190 \pm 177$                | $145 \pm 135$             | $116 \pm 62$              | $175 \pm 166$               | $240 \pm 254$             |
| Fraction in<br>oligomeric<br>form, $\gamma$ [%] | $0.9 \pm 6.5$                 | $0.4 \pm 1.0$                | $0.7 \pm 2.1$             | $2.7 \pm 5.3$             | $1.0 \pm 3.0$               | $0.2 \pm 0.6$             |

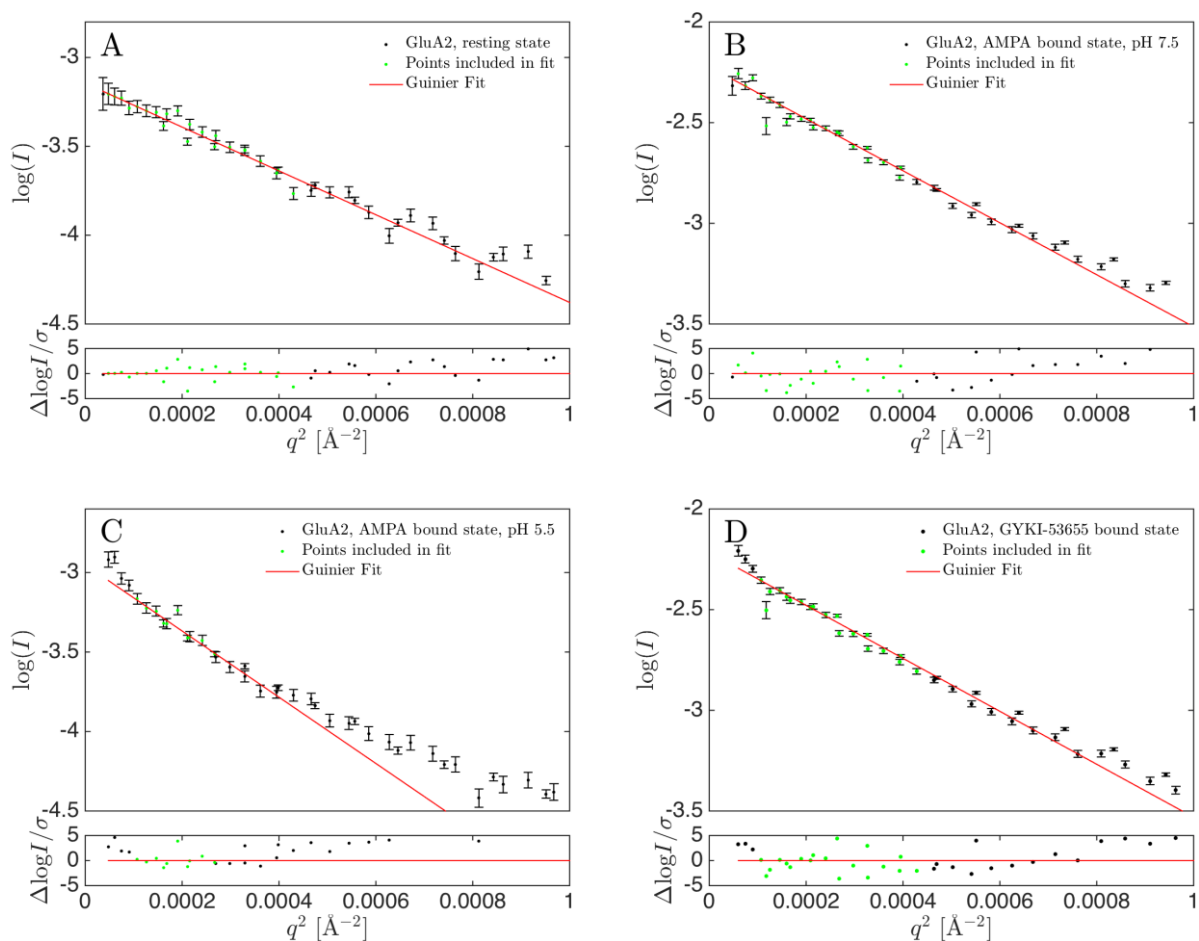

**Figure S1** Guinier plots and residual plots for GluA2 in the resting state (A), in the AMPA bound state at pH 7.5 (B), in the AMPA bound state at pH 5.5 (C) and in the GYKI-53655 bound state (D). Residuals show the difference between  $\log(I)$  and the fit, weighted with the errors on  $\log(I)$ . Resulting values for  $I(0)$  and  $R_g$  are given in Table S1. The AMPA bound state at pH 5.5 (panel C) does not have a fully linear Guinier region at  $qR_g < 1.3$ , meaning that the values for  $I(0)$  and  $R_g$  may be wrong. The values of  $I(0)$  and  $R_g$  from the  $p(r)$  function was therefore used for  $M_w$  determination.



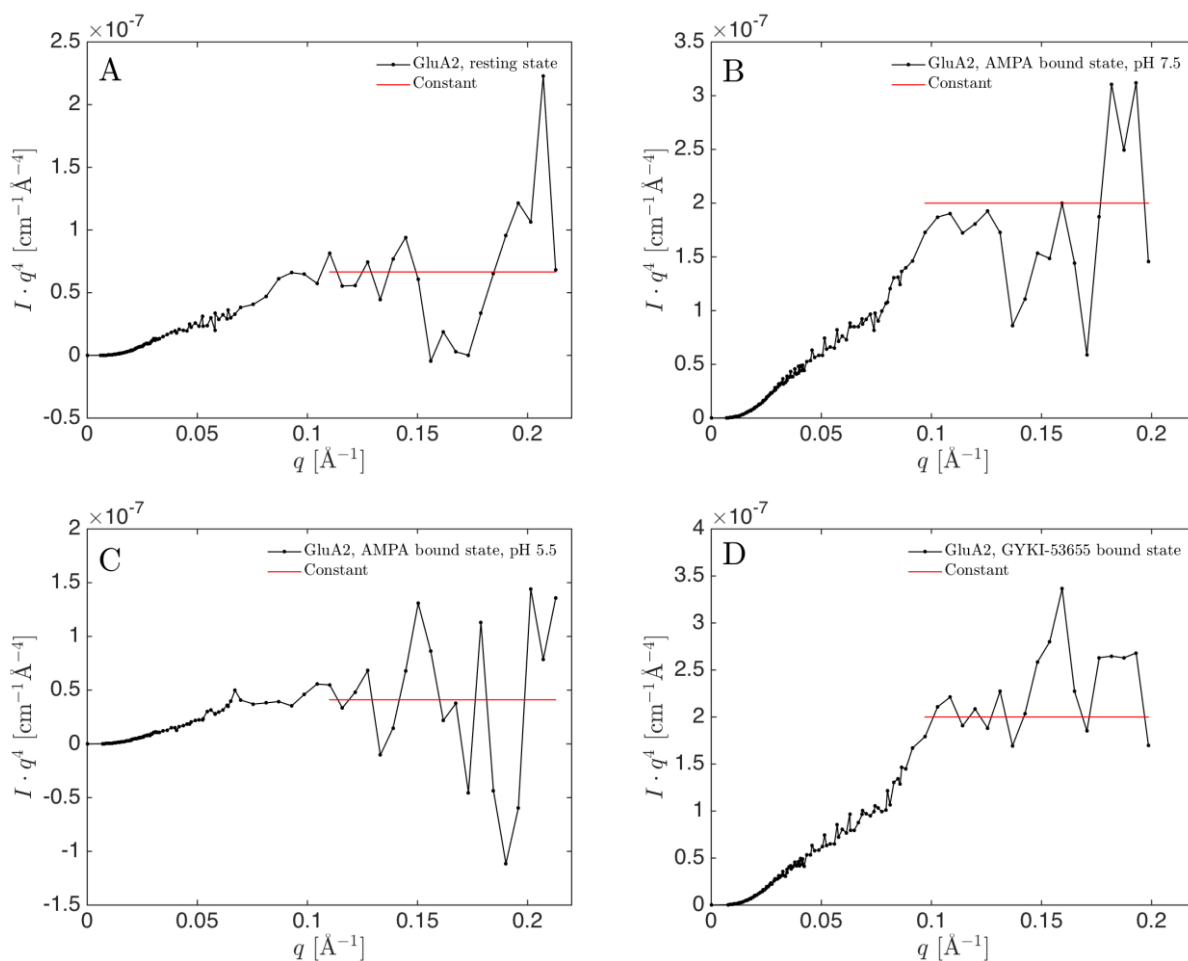

**Figure S2** Porod plots (black) for GluA2 in the resting state (A), in the AMPA bound state at pH 7.5 (B), in the AMPA bound state at pH 5.5 (C) and in the GYKI-53655 bound state (D). Additional constant backgrounds were subtracted to give a constant behavior at high- $q$  (red). The constants are listed in Table S2.

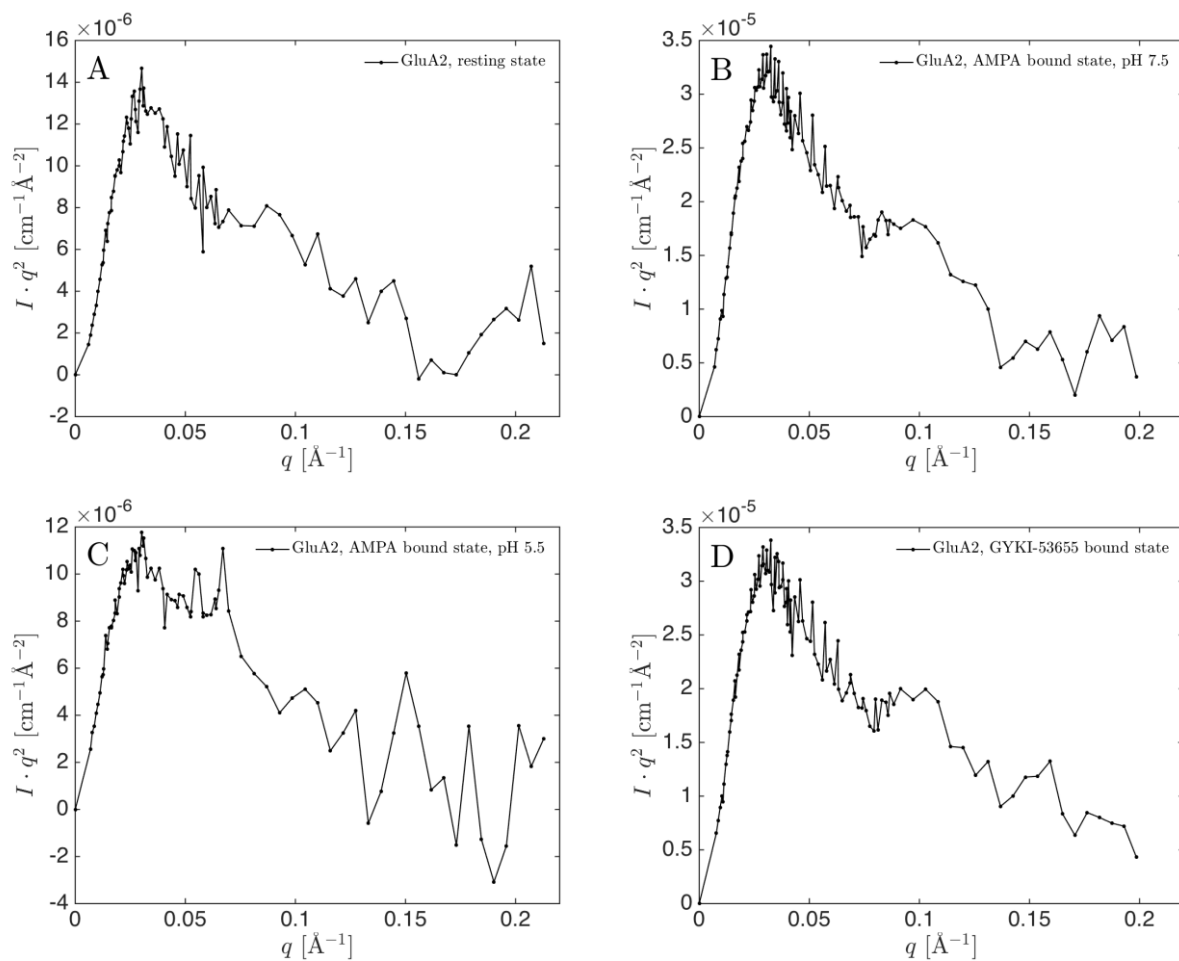

**Figure S3** Kratky plots for GluA2 in the resting state (A), in the AMPA bound state at pH 7.5 (B), in the AMPA bound state at pH 5.5 (C) and in the GYKI-53655 bound state (D). Constant backgrounds were subtracted, and listed in Table S2.

|       |                                                                |     |
|-------|----------------------------------------------------------------|-----|
| 3KG2: | NSIQIGGLFPRGADQEYSAFRVGMVQFSTSEFRLTPHIDNLEVANSFAVTNAFCSQFSRG   | 60  |
| 4U2P: | NSIQIGGLFPRGADQEYSAFRVGMVQFSTSEFRLTPHIDNLEVANSFAVTNAFCSQFSRG   | 60  |
| 5WEO: | NSIQIGGLFPRGADQEYSAFRVGMVQFSTSEFRLTPHIDNLEVANSFAVTNAFCSQFSRG   | 60  |
| 5VHZ: | NSIQIGGLFPRGADQEYSAFRVGMVQFSTSEFRLTPHIDNLEVANSFAVTNAFCSQFSRG   | 60  |
| 5L1H: | NSIQIGGLFPRGADQEYSAFRVGMVQFSTSEFRLTPHIDNLEVANSFAVTNAFCSQFSRG   | 60  |
|       |                                                                |     |
| 3KG2: | VYAIFGFYDKKSVNTITFCGTLHVSFITPSFPTDGTTHPFVIQMRPDLKGALLSLIEYYQ   | 120 |
| 4U2P: | VYAIFGFYDKKSVNTITFCGTLHVSFITPSFPTDGTTHPFVIQMRPDLKGALLSLIEYYQ   | 120 |
| 5WEO: | VYAIFGFYDKKSVNTITFCGTLHVSFITPSFPTDGTTHPFVIQMRPDLKGALLSLIEYYQ   | 120 |
| 5VHZ: | VYAIFGFYDKKSVNTITFCGTLHVSFITPSFPTDGTTHPFVIQMRPDLKGALLSLIEYYQ   | 120 |
| 5L1H: | VYAIFGFYDKKSVNTITFCGTLHVSFITPSFPTDGTTHPFVIQMRPDLKGALLSLIEYYQ   | 120 |
|       |                                                                |     |
| 3KG2: | WDKFAYLYDSRGLSTLQAVLDSAAEKKWQVTAINVGNINNDKKDETYRSLFQDLELKKE    | 180 |
| 4U2P: | WDKFAYLYDSRGLSTLQAVLDSAAEKKWQVTAINVGNINNDKKDETYRSLFQDLELKKE    | 180 |
| 5WEO: | WDKFAYLYDSRGLSTLQAVLDSAAEKKWQVTAINVGNINNDKKDETYRSLFQDLELKKE    | 180 |
| 5VHZ: | WDKFAYLYDSRGLSTLQAVLDSAAEKKWQVTAINVGNINNDKKDETYRSLFQDLELKKE    | 180 |
| 5L1H: | WDKFAYLYDSRGLSTLQAVLDSAAEKKWQVTAINVGNINNDKKDETYRSLFQDLELKKE    | 180 |
|       |                                                                |     |
| 3KG2: | RRVILDCERDKVNDIVDQVITIGKHVKGYHYIIANLGFTDGDLLKIQFGGAEVSGFQIVD   | 240 |
| 4U2P: | RRVILDCERDKVNDIVDQVITIGKHVKGYHYIIANLGFTDGDLLKIQFGGAEVSGFQIVD   | 240 |
| 5WEO: | RRVILDCERDKVNDIVDQVITIGKHVKGYHYIIANLGFTDGDLLKIQFGGAEVSGFQIVD   | 240 |
| 5VHZ: | RRVILDCERDKVNDIVDQVITIGKHVKGYHYIIANLGFTDGDLLKIQFGGAEVSGFQIVD   | 240 |
| 5L1H: | RRVILDCERDKVNDIVDQVITIGKHVKGYHYIIANLGFTDGDLLKIQFGGAEVSGFQIVD   | 240 |
|       |                                                                |     |
| 3KG2: | YDDSLVSKFIERWSTLEEKEYPGAHTATIKYTSALTYDAVQVMTEAFRNLKQRIEISRR    | 300 |
| 4U2P: | YDDSLVSKFIERWSTLEEKEYPGAHTATIKYTSALTYDAVQVMTEAFRNLKQRIEISRR    | 300 |
| 5WEO: | YDDSLVSKFIERWSTLEEKEYPGAHTATIKYTSALTYDAVQVMTEAFRNLKQRIEISRR    | 300 |
| 5VHZ: | YDDSLVSKFIERWSTLEEKEYPGAHTATIKYTSALTYDAVQVMTEAFRNLKQRIEISRR    | 300 |
| 5L1H: | YDDSLVSKFIERWSTLEEKEYPGAHTATIKYTSALTYDAVQVMTEAFRNLKQRIEISRR    | 300 |
|       |                                                                |     |
| 3KG2: | GNAGDCLANPAVPWGQGVIEIERALKQVQVEGLSGNIKFDQNGKRINYTTINIMELKTNGPR | 360 |
| 4U2P: | GNAGDCLANPAVPWGQGVIEIERALKQVQVEGLSGNIKFDQNGKRINYTTINIMELKTNGPR | 360 |
| 5WEO: | GNAGDCLANPAVPWGQGVIEIERALKQVQVEGLSGNIKFDQNGKRINYTTINIMELKTNGPR | 360 |
| 5VHZ: | GNAGDCLANPAVPWGQGVIEIERALKQVQVEGLSGNIKFDQNGKRINYTTINIMELKTNGPR | 360 |
| 5L1H: | GNAGDCLANPAVPWGQGVIEIERALKQVQVEGLSGNIKFDQNGKRINYTTINIMELKTNGPR | 360 |
|       |                                                                |     |
| 3KG2: | KIGYWSEVDKMV--LTEDDTSGLEQKTVVVVTTILESPYVMMKANHAALAGNEREYEGYCV  | 418 |
| 4U2P: | KIGYWSEVDKMV--LTEDDTSGLEQKTVVVVTTILESPYVMMKANHEMLEGNEREYEGYCV  | 420 |
| 5WEO: | KIGYWSEVDKMV--LTEDDTSGLEQKTVVVVTTILESPYVMMKANHEMLEGNEREYEGYCV  | 418 |
| 5VHZ: | KIGYWSEVDKMV--LTEDDTSGLEQKTVVVVTTILESPYVMMKANHEMLEGNEREYEGYCV  | 418 |
| 5L1H: | KIGYWSEVDKMV--LTEDDTSGLEQKTVVVVTTILESPYVMMKANHEMLEGNEREYEGYCV  | 418 |

|       |                                                               |     |
|-------|---------------------------------------------------------------|-----|
| 3KG2: | LAAEIAKHCGFKYKLTIVGDGKYGARDADTKIWNGMVGELVYGKADIAIAPLTTITLVREE | 478 |
| 4U2P: | LAAEIAKHCGFKYKLTIVGDGKYGARDADTKIWNGMVGELVYGKADIAIAPLTTITLVREE | 480 |
| 5WEO: | LAAEIAKHCGFKYKLTIVGDGKYGARDADTKIWNGMVGELVYGKADIAIAPLTTITLVREE | 478 |
| 5VHZ: | LAAEIAKHCGFKYKLTIVGDGKYGARDADTKIWNGMVGELVYGKADIAIAPLTTITLVREE | 478 |
| 5L1H: | LAAEIAKHCGFKYKLTIVGDGKYGARDADTKIWNGMVGELVYGKADIAIAPLTTITLVREE | 478 |
| 3KG2: | VIDFSKPFMSLGLISIMIKKPQKSKPGVFSFLDPLAYEIWMCIVFAYIGVSVVLFVLSRFS | 538 |
| 4U2P: | VIDFSKPFMSLGLISIMIKKPQKSKPGVFSFLDPLAYEIWMAIVFAYIGVSVVLFVLSRFS | 540 |
| 5WEO: | VIDFSKPFMSLGLISIMIKKPQKSKPGVFSFLDPLAYEIWMCIVFAYIGVSVVLFVLSRFS | 538 |
| 5VHZ: | VIDFSKPFMSLGLISIMIKKPQKSKPGVFSFLDPLAYEIWMCIVFAYIGVSVVLFVLSRFS | 538 |
| 5L1H: | VIDFSKPFMSLGLISIMIKKPQKSKPGVFSFLDPLAYEIWMCIVFAYIGVSVVLFVLSRFS | 536 |
| 3KG2: | PYEWHTEEFEDGRETQSSESTNEFGIFNSLWFSLGAFMQQADISPRSLSGRIVGGVWWF   | 598 |
| 4U2P: | PYEWHTEEFEDGRETQSSESTNEFGIFNSLWFSLGAFMQQADISPRSLSGRIVGGVWWF   | 600 |
| 5WEO: | PYEWHTEEFEDGRETQSSESTNEFGIFNSLWFSLGAFMQQADISPRSLSGRIVGGVWWF   | 598 |
| 5VHZ: | PYEWHTEEFEDGRETQSSESTNEFGIFNSLWFSLGAFMQQADISPRSLSGRIVGGVWWF   | 598 |
| 5L1H: | -----TDSTNEFGIFNSLWFSLGAFMQQADISPRSLSGRIVGGVWWF               | 579 |
| 3KG2: | FTLIIISSYTANLAAFLTVERMVSPIESAEDLSKQTEIAYGTLDSGSTKEFFRRSKIAVF  | 658 |
| 4U2P: | FTLIIISSYTANLAAFLTVERMVSPIESAEDLSKQTEIAYGTLDSGSTKEFFRRSKIAVF  | 660 |
| 5WEO: | FTLIIISSYTANLAAFLTVERMVSPIESAEDLSKQTEIAYGTLDSGSTKEFFRRSKIAVF  | 658 |
| 5VHZ: | FTLIIISSYTANLAAFLTVERMVSPIESAEDLSKQTEIAYGTLDSGSTKEFFRRSKIAVF  | 658 |
| 5L1H: | FTLIIISSYTANLAAFLTVERMVSPIESAEDLSKQTEIAYGTLDSGSTKEFFRRSKIAVF  | 639 |
| 3KG2: | DKMWTYMRSAEPSVFRVTTAEGVARVRKSKGKYAYLLESTMNEYIEQRKPCDTMKVGGNL  | 718 |
| 4U2P: | DKMWTYMRSAEPSVFRVTTAEGVARVRKSKGKYAYLLESTMNEYIEQRKPCDTMKVGGNL  | 720 |
| 5WEO: | DKMWTYMRSAEPSVFRVTTAEGVARVRKSKGKYAYLLESTMNEYIEQRKPCDTMKVGGNL  | 718 |
| 5VHZ: | DKMWTYMRSAEPSVFRVTTAEGVARVRKSKGKYAYLLESTMNEYIEQRKPCDTMKVGGNL  | 718 |
| 5L1H: | DKMWTYMRSAEPSVFRVTTAEGVARVRKSKGKYAYLLESTMNEYIEQRKPCDTMKVGGNL  | 699 |
| 3KG2: | DSKGYGIATPKGSSLGTPVNLAVLKLSEQGLLDKLNKWWYDKGECGAKDSGSKEKTSAL   | 778 |
| 4U2P: | DSKGYGIATPKGSSLGTPVNLAVLKLSEQGLLDKLNKWWYDKGECGAKDSGSKEKTSAL   | 780 |
| 5WEO: | DSKGYGIATPKGSSLGTPVNLAVLKLSEQGLLDKLNKWWYDKGECGAKDSGSKEKTSAL   | 778 |
| 5VHZ: | DSKGYGIATPKGSSLGTPVNLAVLKLSEQGLLDKLNKWWYDKGECGAKDSGSKEKTSAL   | 778 |
| 5L1H: | DSKGYGIATPKGSSLGTPVNLAVLKLSEQGLLDKLNKWWYDKGECGAKDSGSKEKTSAL   | 759 |
| 3KG2: | SLSNVAGVFYIILVGGLGLAMLVALIEFCYKSRAEAKRMKGLVPRG                | 823 |
| 4U2P: | SLSNVAGVFYIILVGGLGLAMLVALIEFCYKSRAEAKRMKGLVPR-                | 824 |
| 5WEO: | SLSNVAGVFYIILVGGLGLAMLVALIEFCYKSRAEAKRMK-----                 | 817 |
| 5VHZ: | SLSNVAGVFYIILVGGLGLAMLVALIEFCYKSRAEAKRMK-----                 | 817 |
| 5L1H: | SLSNVAGVFYIILVGGLGLAMLVALIEFCYKSRAEAKRMKGLVPR-                | 803 |

**Figure S4** Sequence alignment of GluA2 structures used in present study. The alignment was made using Clustal Omega (Goujon, M., McWilliam. H., Li, W., Valentin, F., Squizzato, S., Paern, J. & Lopez, R. A new bioinformatics analysis tools framework at EMBL-EBI (2010) *Nucl. Acids Res.* W695-699). Residues in green are differing from the target sequence (3kg2). The residues marked in italics were not seen in the structures (for chain A, similar for the other chains).

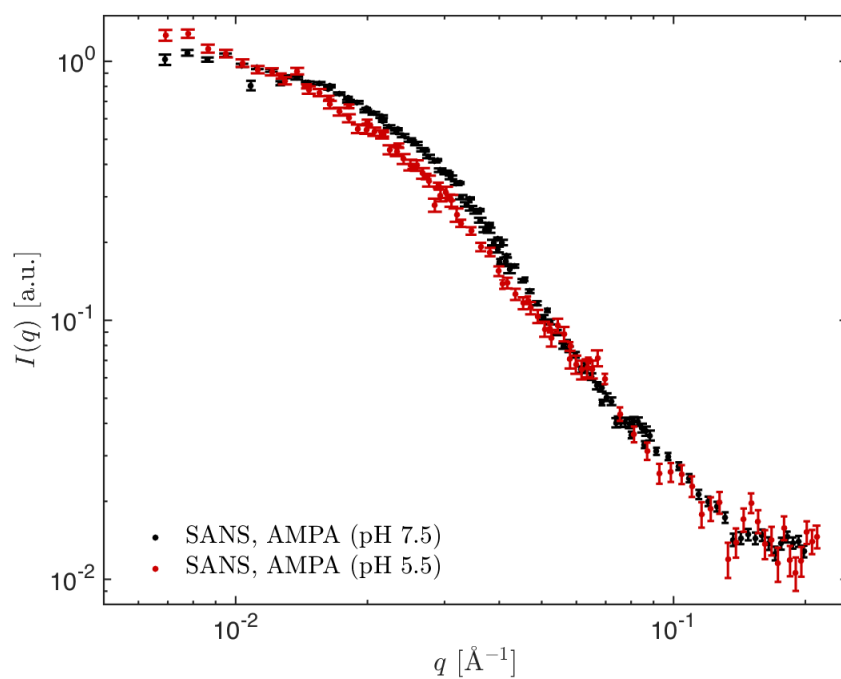

**Figure S5** SANS data of GluA2 in the presence of 1 mM AMPA at pH 7.5 (black) and 10 mM AMPA at pH 5.5 (red)

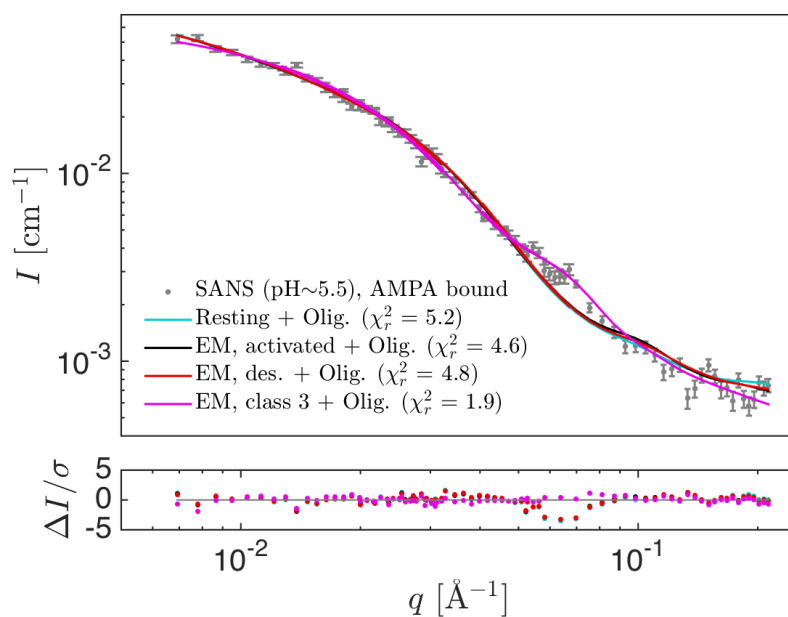

**Figure S6** Additional fits to SANS data of GluA2 in the AMPA bound state at pH 5.5 (grey). The data were fitted with models of tetrameric GluA2 in combination with fractal oligomers. Models included GluA2 in the resting state (cyan, pdb-code 4u2p,  $\chi_r^2 = 5.2$ ), GluA2 in the activated state (black; pdb-code 5weo;  $\chi_r^2 = 4.6$ ), GluA2 in the desensitized state (red; pdb-code 5lhv;  $\chi_r^2 = 4.8$ ) and the class 3 EM structure (magenta; EMD-2688;  $\chi_r^2 = 1.9$ ).

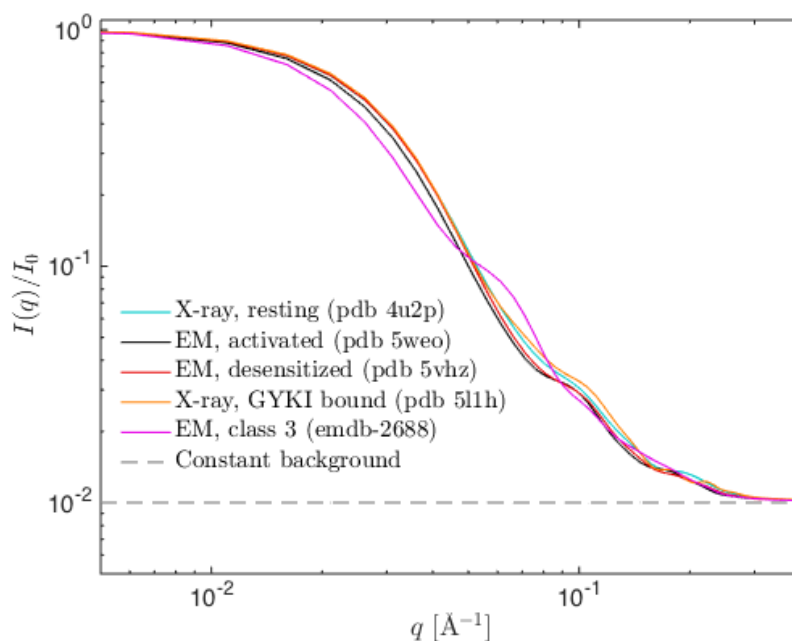

**Figure S7** Theoretical SANS scattering for all investigated structures. GluA2 in the resting state (X-ray; cyan; pdb-code 4u2p), in the activated state (EM; black; pdb-code 5weo), in the desensitized state (EM; pdb-code 5vhz), in the GYKI-53655 bound state (X-ray; orange; pdb-code 5l1h) and GluA2 in the class 3 state (EM; magenta; EMDB-2688). Data are normalized and a constant background of  $0.01 \cdot I(0)$  is subtracted (grey dashed line). The compact forms are similar, whereas the scattering curve for the more open EM class 3 structure is clearly distinguishable by eye. The compact structures differs only at high  $q$ -values, where the the signal to noise ratio is low.



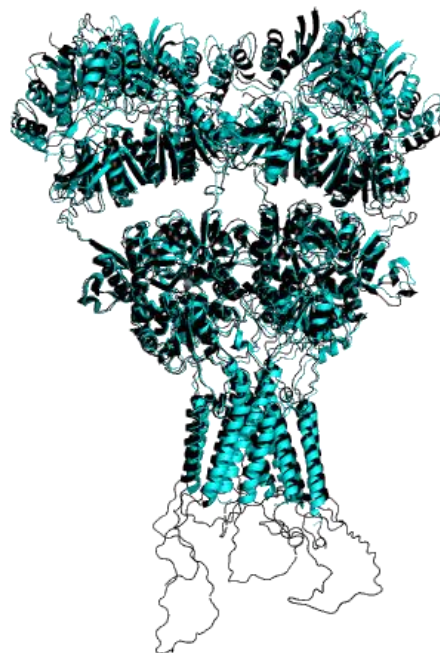

**Figure S8** Generated structure of GluA2 in the resting state. Due to missing residues in the X-ray structure of GluA2 in the resting state (cyan; pdb-code 4u2p), a model structure was generated of GluA2 (black) using Modeller (Fiser et al., 2000), with the missing residues inserted as loops.

## References

Fischer, H., de Oliveira Neto, M., Napolitano, H. B., Polikarpov, I. & Craievich, A. F. (2010). *J. Appl. Cryst.* **43**, 101-109.

Fiser, A., Do, R.K.G. & Šali, A. (2000). *Protein Sci.* **9**, 1753-1773.

Petoukhov, M. V., Franke, D., Shkumatov, A. V., Tria, G., Kikhney, A. G., Gajda, M., Gorba, C., Mertens, H. D., Konarev, P.V. & Svergun, D. I. (2012). *J. Appl. Cryst.* **45**, 342-350.

Porod, G. (1982). *Small Angle X-ray Scattering* (Glatter, O. & Kratky, O., ed.), New York: Academic Press, Chapter 2, 17-52.
